# Supplementary material for: Temporal and seasonal variability of low-latitude D-region ionospheric response to solar flares using VLF observations
Source: Research Square preprint supplement (doi:10.21203/rs.3.rs-8615895/v1), 2026-01-27
Supplement: Supplementary file 1 [file e697fa76bb91ae586d6c6815.docx]

**Supplementary information**

**Temporal and seasonal variability of low-latitude D-region ionospheric response to solar flares using VLF observations**

**Shivani Chandra1 Rajat Tripathi1, Mahesh N. Shrivastava2 Abhirup Datta3, Sudipta Sasmal4, Rajesh Singh5 and Ajeet K Maurya1***

1Department of Physics, Babasaheb Bhimrao Ambedkar University, Lucknow, India

2Department of Geological Sciences, Universidad Católica del Norte, Antofagasta 1270398, Chile

3Department of Astronomy, Astrophysics and Space Engineering, Indian Institute of Technology Indore, India

4Institute of Astronomy Space and Earth Science, P177, CIT Road, Kolkata, India

5KSK Geomagnetic Research Laboratory, IIG, Prayagraj, India

*Corresponding author: [ajeet.iig@gmail.com](mailto:ajeet.iig@gmail.com)

Table 1:

| **Date** | **Flare** | **Amp difference (dB)** | **Local Time (LT)** | **Start time delay**  **(min)** | **peak time delay**  **(min)** | **end time delay**  **(min)** | **SZA**  **(°)** | **(min)** | **Solar flare location on solar disk** | **Reflection height (km)** | **Sharpness factor** |
| --- | --- | --- | --- | --- | --- | --- | --- | --- | --- | --- | --- |
| 08-Nov-20 | C5.7 | 1.48 | 10:51 | 2 | 3 | 35 | -3.44° | -12 | S23E05 | 74.5 | 0.32 |
| 25-Nov-20 | C3.4 | 1.16 | 09:36 | 3 | 5 | 34 | -37.57° | -17 | S17E51 | 73.7 | 0.32 |
| 01-Dec-20 | C3.8 | 0.66 | 10:00 | 10 | 4 | 16 | -11° | -12 | S23E61 | 72.1 | 0.36 |
| 23-Jun-21 | C3.4 | 0.51 | 12:41 | 13 | 4 | 31 | -15.89° | 6 | - | 73.9 | 0.33 |
| 09-Jul-21 | C6 | 2.18 | 13:28 | 10 | 3 | 37 | -19.82° | 1 | N27W0* | 74.1 | 0.3 |
| 28-Aug-21 | C7 | 0.91 | 10:36 | 1 | 2 | 26 | -61.71° | -30 | S27W11 | 73.2 | 0.33 |
| 28-Aug-21 | M4.79 | 3.72 | 11:41 | 6 | 0 | 2 | -9.43° | -24 | S27W11 | 73 | 0.37 |
| 28-Aug-21 | C4.3 | 0.43 | 14:18 | 2 | 3 | 56 | 33.42° | -22 | S27W11 | 73.1 | 0.32 |
| 29-Aug-21 | C8.2 | 1.38 | 15:32 | 5 | -1 | 23 | -47.43° | -11 | S29W23 | 73.8 | 0.31 |
| 29-Aug-21 | C7.5 | 2.11 | 06:16 | 2 | 2 | 30 | 9.88° | -8 | S29W23 | 73.3 | 0.32 |
| 17-Sep-21 | C3.5 | 2.15 | 09:59 | 6 | 9 | 0 | -27.53° | 8 | - | 73.4 | 0.3 |
| 23-Sep-21 | M2.8 | 3.57 | 10:14 | 1 | 2 | 40 | -41.7° | -5 | S28E10 | 72 | 0.31 |
| 24-Sep-21 | C3 | 0.39 | 12:35 | 2 | 4 | 35 | -8.3° | 9 | S25E01 | 71.3 | 0.31 |
| 12-Jul-22 | C7.7 | 1.42 | 09:01 | 2 | 4 | 19 | -66.78° | -15 | S17E37 | 73.8 | 0.32 |
| 14-Jul-22 | M1.2 | 1.88 | 10:06 | 5 | 5 | 20 | -20.39° | -15 | N15E71 | 73 | 0.38 |
| 29-Jul-22 | C4.2 | 0.63 | 10:06 | 1 | 4 | 27 | -7.67° | 10 | S15E43 | 73.4 | 0.36 |
| 05-Aug-22 | C5 | 1.34 | 12:17 | 6 | 3 | 24 | -59.21° | -74 | S15W53 | 73.3 | 0.31 |
| 13-Aug-22 | C3.3 | 0.69 | 10:45 | 2 | 4 | 22 | -60.89° | -15 | S11W26 | 71.2 | 0.36 |
| 16-Aug-22 | C8.6 | 1.55 | 05:48 | 4 | 5 | 24 | -48.3° | -5 | S24W19 | 73.1 | 0.34 |
| 16-Aug-22 | M5.08 | 4.1 | 13:31 | 2 | 3 | 40 | 6.75° | -5 | S24W19 | 73 | 0.37 |
| 18-Aug-22 | C5.8 | 1.14 | 11:35 | 5 | 3 | 14 | 3.74° | -28 | S24W48 | 73.7 | 0.31 |
| 18-Aug-22 | C3.7 | 0.31 | 14:27 | 14 | 5 | 21 | 27.64° | -49 | S24W48 | 73.4 | 0.38 |
| 18-Aug-22 | M1.4 | 1.7 | 15:42 | 7 | 3 | 32 | 43.09° | -48 | S24W48 | 73 | 0.36 |
| 26-Aug-22 | C7.3 | 1.24 | 11:57 | 5 | 1 | 25 | -42.75° | 1 | S27W58 | 73.8 | 0.311 |
| 27-Aug-22 | C8.9 | 0.66 | 12:33 | 5 | 2 | 4 | 67.05 | -15 | S17W79 | 73.4 | 0.32 |
| 28-Aug-22 | M1.4 | 3.65 | 07:05 | 23 | 1 | 32 | -49.55° | -12 | S25W85 | 69 | 0.41 |
| 28-Aug-22 | C7.5 | 1.2 | 08:15 | 3 | 4 | 20 | -18.22° | -9 | S25W85 | 73.6 | 0.32 |
| 28-Aug-22 | C9.9 | 2.44 | 13:20 | 2 | 2 | 36 | 13.26° | 5 | S25W85 | 71.5 | 0.33 |
| 01-Oct-22 | C6.4 | 1.06 | 10:37 | 3 | 4 | 18 | -48.65° | -2 | S24W67 | 73.3 | 0.32 |
| 02-Oct-22 | M8.77 | 5.11 | 07:54 | 7 | 3 | 64 | -57.48° | 2 | N16W50 | 68 | 0.49 |
| 03-Oct-22 | M2.6 | 4.16 | 08:08 | 1 | 5 | 38 | -55.8° | -21 | - | 68 | 0.36 |
| 03-Oct-22 | C7.6 | 1.99 | 12:56 | 6 | 3 | 38 | -26.13° | -7 | N19W64 | 73.8 | 0.34 |
| 03-Oct-22 | M4.2 | 5.34 | 15:42 | 5 | 1 | 41 | 35.96° | -31 | N19W64 | 67 | 0.48 |
| 08-Oct-22 | C6.6 | 2.4 | 06:15 | 8 | 5 | 22 | -43.96° | -18 | N22W17 | 73.8 | 0.33 |
| 14-Oct-22 | M1.3 | 1.35 | 15:18 | 10 | 4 | 76 | 29.31° | -31 | N23W92 | 73 | 0.31 |
| 21-Oct-22 | C2.6 | 0.71 | 11:48 | 7 | 5 | 49 | 12.09° | 5 | - | 73.5 | 0.31 |
| 22-Oct-22 | C6.5 | 2.56 | 11:13 | 4 | 1 | 23 | -13.84° | -13 | - | 73.5 | 0.32 |
| 04-Nov-22 | C5.7 | 1.73 | 13:15 | 2 | 1 | 17 | -1.15° | -41 | N15E76 | 71.3 | 0.31 |
| 11-Nov-22 | C4.3 | 0.39 | 07:24 | 2 | 3 | 47 | 24.03° | -15 | N13W14 | 73.8 | 0.29 |
| 11-Nov-22 | M1.2 | 2.26 | 12:48 | 8 | 4 | 30 | -4.97° | -17 | N13W14 | 72 | 0.31 |
| 12-Nov-22 | C4.6 | 0.81 | 07:57 | 3 | 3 | 26 | -29.34° | -9 | N15W28 | 72.8 | 0.35 |
| 15-Nov-22 | C6.8 | 1.41 | 12:38 | 4 | 5 | 19 | -60.34° | 6 | N25W76 | 73 | 0.4 |
| 15-Nov-22 | M1 | 2.11 | 08:25 | 6 | 4 | 45 | -61.77° | 6 | - | 73.9 | 0.34 |
| 19-Nov-22 | C8.5 | 2.06 | 12:58 | 5 | 5 | 32 | 19.04° | 12 | N22W56 | 71.5 | 0.34 |
| 22-Nov-22 | C7.1 | 0.88 | 12:57 | 6 | 0 | 10 | 10.87° | 6 | S19E07 | 73.3 | 0.35 |
| 02-Dec-22 | C3.7 | 1.5 | 07:41 | 4 | 4 | 29 | -0.69° | -28 | S17E59 | 73.1 | 0.33 |
| 15-Dec-22 | M2.4 | 3.51 | 12:40 | 3 | 3 | 15 | -12.06° | -5 | S19W69 | 69 | 0.45 |
| 15-Dec-22 | M1.5 | 2.59 | 15:50 | 14 | 3 | 12 | 22.25° | -6 | S19W69 | 69 | 0.41 |
| 15-Dec-22 | M1.6 | 3.85 | 07:15 | 6 | 8 | 11 | -79.6° | -7 | S19W69 | 72 | 0.35 |
| 16-Dec-22 | M3.5 | 5.41 | 07:34 | 5 | 3 | 44 | -76.61° | 4 | - | 67 | 0.49 |
| 16-Dec-22 | M1.2 | 2.33 | 12:15 | 3 | 3 | 24 | -17.28° | 1 | - | 72 | 0.31 |
| 16-Dec-22 | M1.6 | 2.89 | 13:11 | 4 | 3 | 28 | -5.71° | -3 | - | 72 | 0.38 |
| 25-Dec-22 | C7.8 | 1.69 | 12:35 | 2 | 4 | 36 | -57.02° | -14 | N21W33 | 71.1 | 0.33 |
| 27-Dec-22 | M1 | 2.26 | 13:46 | 6 | 1 | 13 | 0.09° | -58 | N19E51 | 72 | 0.31 |
| 29-Dec-22 | M1.2 | 2.22 | 12:55 | 3 | -2 | 32 | -10.41° | -10 | - | 72 | 0.3 |
| 19-Jan-23 | M1.1 | 2.12 | 09:38 | 2 | 5 | 9 | -52.8° | -10 | N12E31 | 73 | 0.4 |
| 09-Feb-23 | M3 | 3.5 | 08:43 | 9 | 3 | 32 | -62.08° | -24 | S08E58 | 70.2 | 0.4 |
| 08-Feb-23 | M2 | 3.49 | 08:26 | 6 | 3 | 22 | -65.44° | -7 | N31W15 | 70 | 0.4 |
| 12-Feb-23 | M3.1 | 3.89 | 14:20 | 8 | 2 | 23 | 9.25° | -8 | S11E22 | 69 | 0.4 |
| 14-Feb-23 | C9.6 | 1.59 | 11:58 | 6 | 3 | 5 | 11.66° | 6 | N11E19 | 71.8 | 0.33 |
| 24-Feb-23 | C8.6 | 1.32 | 11:45 | 10 | 3 | 10 | -49.87° | -5 | S22W08 | 73.3 | 0.35 |
| 25-Feb-23 | C8 | 0.94 | 09:58 | 9 | 6 | 10 | -14.74° | -3 | N25W46 | 74.2 | 0.31 |
| 01-Mar-23 | C6.4 | 0.53 | 09:51 | 1 | 2 | 15 | -5.85° | -16 | S16E55 | 73.7 | 0.32 |
| 02-Mar-23 | C9.2 | 1.49 | 10:22 | 4 | 2 | 33 | -49.06° | -9 | S25W69 | 73.8 | 0.36 |
| 02-Mar-23 | C4.1 | 0.88 | 09:27 | 1 | 3 | 16 | -73.28° | -12 | - | 74.1 | 0.34 |
| 03-Mar-23 | M3.3 | 4.52 | 16:06 | 2 | 4 | 46 | 34.11° | -13 | N23W75 | 68 | 0.41 |
| 04-Mar-23 | C6.6 | 0.95 | 13:57 | 5 | 3 | 11 | -47.95° | -10 | N25W90 | 73 | 0.34 |
| 05-Mar-23 | C8.2 | 0.24 | 09:27 | 3 | 3 | 26 | -14.14° | -21 | N18W61 | 73 | 0.32 |
| 05-Mar-23 | M1.3 | 2.59 | 08:27 | 6 | 5 | 30 | -64.64° | -12 | N09W17 | 73.5 | 0.37 |
| 07-Mar-23 | C4.7 | 0.49 | 09:39 | 2 | 4 | 27 | -47.84° | -25 | N18W87 | 73.6 | 0.32 |
| 08-Mar-23 | M1.1 | 2.84 | 15:45 | 7 | 3 | 5 | 31.75° | -3 | N10W15 | 70 | 0.36 |
| 10-Mar-23 | C7.1 | 1.7 | 12:40 | 15 | 2 | 22 | -28.56° | 5 | S23W15 | 73.2 | 0.32 |
| 19-Mar-24 | C5.2 | 0.53 | 09:21 | 7 | 4 | 23 | -5.21° | -9 | N02W46 | 73.2 | 0.37 |
| 30-Mar-23 | M5.41 | 3.48 | 13:09 | 6 | 2 | 36 | 5.55° | -5 | S23W89 | 69 | 0.37 |
| 06-Apr-23 | M3.01 | 3.12 | 11:23 | 4 | 2 | 12 | -15.32° | -14 | S20E72 | 72 | 0.35 |
| 08-Apr-23 | M2.9 | 4.07 | 07:18 | 1 | 2 | 49 | -51.96° | -17 | S22E50 | 69 | 0.41 |
| 08-Apr-23 | C5.3 | 0.59 | 10:18 | 7 | 6 | 30 | -45.45° | -14 | S22E50 | 73.9 | 0.31 |
| 09-Apr-23 | C9 | 1.98 | 11:40 | 3 | 2 | 30 | -15.23° | -6 | S21E37 | 74.5 | 0.33 |
| 10-Apr-23 | M2.83 | 3 | 10:51 | 2 | 1 | 36 | -20.72° | -29 | S22E75 | 71 | 0.4 |
| 17-Apr-23 | C2.8 | 0.37 | 05:47 | 4 | 0 | 2 |  |  | - | 72.8 | 0.35 |
| 03-May-23 | M4.2 | 5.11 | 15:00 | 4 | 3 | 18 | 36.76° | -4 | S22W84 | 68 | 0.46 |
| 04-May-23 | C5.2 | 1.61 | 10:37 | 2 | 4 | 8 | -17.53° |  | - | 73.3 | 0.32 |
| 09-May-23 | M6.5 | 3.62 | 09:27 | 7 | 3 | 34 | -39.29° | -8 | N14W34 | 72 | 0.32 |
| 11-May-23 | M2.2 | 3.3 | 14:33 | 7 | 2 | 8 | 32.02° | -3 | S08W51 | 70 | 0.38 |
| 19-May-23 | M5.3 | 3.5 | 06:21 | 2 | 3 | 26 | -39.64° | 15 | N18E59 | 71 | 0.45 |
| 21-May-23 | M1.4 | 2.85 | 08:00 | 3 | 7 | 21 | -36.44° | -19 | N18E33 | 71 | 0.38 |
| 21-May-23 | C4.9 | 0.57 | 09:30 | 3 | 3 | 13 | -21.22° | -16 | N18E33 | 73.4 | 0.34 |
| 25-May-23 | C7.4 | 1.65 | 11:13 | 4 | 2 | 12 | 33.29° | -11 | N17W19 | 74.3 | 0.33 |
| 02-Jun-23 | M1.5 | 2.34 | 08:13 | 7 | 2 | 27 |  | -10 | N15W12 | 73 | 0.42 |
| 04-Jun-23 | C8.7 | 2.16 | 09:21 | 7 | 6 | 20 | -16.97° | 4 | S05E19 | 72.7 | 0.36 |
| 08-Jun-23 | C7.2 | 1.15 | 10:30 | 8 | 1 | 20 | 10.97° | -8 | S16E14 | 73.6 | 0.32 |
| 16-Jul-23 | M1.1 | 1.46 | 12:01 | 4 | 3 | 31 | 0.52° | -12 | N24E12 | 73 | 0.34 |
| 18-Jun-23 | M1.3 | 2.65 | 06:09 | 4 | 8 | 38 | -35.35 | -33 | S21E17 | 72 | 0.41 |
| 12-Aug-23 | C1.9 | 1.17 | 13:10 | 1 | 2 | 2 | -40.22° | 1 | - | 74.1 | 0.33 |
| 15-Aug-23 | C4.1 | 0.54 | 12:30 | 9 | 4 | 19 | -86.58° | 14 | N12W87 | 73.3 | 0.36 |
| 15-Aug-23 | C2.3 | 0.64 | 08:43 | 5 | 4 | 5 | -44.74° | 13 | - | 73.4 | 0.34 |
| 17-Aug-23 | C3.6 | 0.59 | 08:18 | 8 | 2 | 3 | -43.04° | -5 | N08E35 | 73.7 | 0.36 |
| 19-Aug-23 | C5.8 | 0.93 | 12:19 | 5 | 2 | 13 | 5.49° | 9 | S30W75 | 71.4 | 0.32 |
| 21-Aug-23 | C4.3 | 0.86 | 13:27 | 10 | 4 | 19 | 0.33° | 0 | - | 73.7 | 0.33 |
| 25-Aug-23 | M1.4 | 3.85 | 06:45 | 1 | 6 | 27 | -48.51° | 0 | S09E35 | 70 | 0.44 |
| 29-Aug-23 | C2.1 | 0.19 | 12:15 | 6 | 3 | 18 | 2.91° | -8 | - | 73.8 | 0.31 |
| 02-Sep-23 | M3.3 | 3.73 | 12:37 | 6 | -5 | 46 | 2.14° | -61 | N09W86 | 68 | 0.44 |
| 03-Sep-23 | M6 | 4.14 | 14:09 | 7 | 3 | 34 | 21.49° | -29 | N10W0* | 70 | 0.46 |
| 05-Sep-23 | M2 | 3.01 | 13:45 | 2 | 3 | 31 | 16.12° | -1 | N14W13 | 71 | 0.4 |
| 09-Sep-23 | C8.4 | 0.98 | 06:52 | 2 | 3 | 11 | -23.39° | -2 | N14W66 | 73.1 | 0.33 |
| 09-Sep-23 | C5.7 | 0.91 | 09:28 | 10 | 4 | 13 | -20.29° | -8 | N14W66 | 72.9 | 0.36 |
| 09-Sep-23 | C3.5 | 0.32 | 11:30 | 5 | 4 | 22 | -52.54° | -1 | N14W66 | 72.8 | 0.35 |
| 10-Sep-23 | C8.3 | 2.51 | 07:30 | 1 | 5 | 20 | -49.31° | 5 | N12W17 | 71.4 | 0.38 |
| 10-Sep-23 | C3.6 | 0.67 | 10:06 | 6 | 1 | 27 | -25.44° | 6 | N12W17 | 72.8 | 0.37 |
| 12-Sep-23 | M2.5 | 3.51 | 12:39 | 5 | 2 | 31 | 1.53° | 31 | N16W46 | 71 | 0.47 |
| 12-Sep-23 | C7.2 | 1.41 | 13:40 | 3 | 5 | 18 | -63.75° | 27 | - | 73.8 | 0.35 |
| 13-Sep-23 | C5.4 | 1.03 | 13:43 | 4 | 4 | 75 | -31.37° | -38 | N17W63 | 73.5 | 0.32 |
| 15-Sep-23 | C7 | 1.01 | 11:36 | 10 | 3 | 59 | -30.12° | -10 | N10W09 | 74.1 | 0.34 |
| 15-Sep-23 | C7.4 | 1.43 | 08:42 | 5 | 3 | 43 | 27.03° | -11 | N10W09 | 73.9 | 0.31 |
| 16-Sep-23 | M3.43 | 2.89 | 11:12 | 2 | 5 | 29 | -17.94° | 1 | N11W23 | 71 | 0.32 |
| 16-Sep-23 | M2.92 | 2.09 | 06:28 | 9 | 8 | 7 | -56.52° | -4 | N11W23 | 72 | 0.37 |
| 19-Sep-23 | M1.8 | 3.4 | 15:10 | 8 | 3 | 63 | 32.28° | -67 | N09E42 | 71 | 0.46 |
| 19-Sep-23 | M1.1 | 1.76 | 09:27 | 3 | 3 | 34 | -28.41° | -55 | N09E42 | 70 | 0.41 |
| 22-Sep-23 | C5.3 | 0.62 | 14:15 | 0 | 4 | 14 | -63.95° | -18 | N19W40 | 73.9 | 0.34 |
| 22-Sep-23 | C6.4 | 0.33 | 12:33 | 2 | 3 | 16 | -41.09° | -15 | S02W06 | 73.7 | 0.31 |
| 23-Sep-23 | C7.6 | 1.18 | 14:46 | 8 | 4 | 19 | -72.79° | -19 | S15E19 | 73.1 | 0.32 |
| 23-Sep-23 | C3.6 | 0.45 | 11:12 | 3 | 3 | 16 | 26.9° | -20 | N28W54 | 73.2 | 0.34 |
| 23-Sep-23 | C3.7 | 0.46 | 12:49 | 5 | 4 | 21 | -66.06° | -20 | S15E19 | 73.1 | 0.35 |
| 24-Sep-23 | M4.43 | 1.83 | 08:58 | 1 | 1 | 44 | -45.52° | -25 | S15E07 | 72 | 0.31 |
| 24-Sep-23 | C6.9 | 0.81 | 15:15 | 5 | 6 | 14 | -61.61° | -14 | S15E07 | 73.2 | 0.32 |
| 24-Sep-23 | C4.5 | 0.43 | 11:49 | 7 | 3 | 0 | -76.01° | -16 | S15E07 | 74.1 | 0.32 |
| 25-Sep-23 | C9.9 | 1.49 | 13:45 | 17 | 3 | 52 | -15.56° | 0 | S14W09 | 73.7 | 0.34 |
| 26-Sep-23 | C5.7 | 0.88 | 10:04 | 1 | 7 | 24 | -25.78° | -53 | S13W23 | 74.2 | 0.33 |
| 28-Sep-23 | M1.3 | 1.22 | 14:36 | 7 | 3 | 19 | 23.98° | -13 | S17E56 | 73 | 0.34 |
| 28-Sep-23 | C3 | 0.36 | 09:36 | 2 | 4 | 13 | 8.49° | -19 | S17E56 | 72.1 | 0.33 |
| 28-Sep-23 | C3.4 | 0.41 | 11:43 | 4 | 3 | 19 | 15.67° | -8 | S17E56 | 73.9 | 0.32 |
| 30-Sep-23 | C8 | 0.8 | 11:33 | 3 | 4 | 24 | -28.35° | -24 | S13W76 | 74.2 | 0.32 |
| 01-Oct-23 | C3.6 | 0.36 | 10:48 | 2 | 4 | 24 | 12.62° | -21 | S20E18 | 73 | 0.36 |
| 01-Oct-23 | C9.2 | 1.21 | 08:58 | 2 | 5 | 25 | -14.88° | -19 | - | 72.6 | 0.41 |
| 01-Oct-23 | M2.5 | 1.99 | 07:04 | 6 | 3 | 3 | -61.81° | -24 | N12E48 | 72 | 0.33 |
| 10-Oct-23 | M1.61 | 2.45 | 07:40 | 4 | 2 | 22 | -61.49° | 0 | N18W74 | 72 | 0.43 |
| 14-Oct-23 | C9.8 | 1.37 | 10:48 | 5 | 4 | 13 | 13.25° | -9 | S10W57 | 73.7 | 0.33 |
| 29-Oct-23 | C4.3 | 0.74 | 13:18 | 6 | 2 | 10 | -65.34° | -38 | S17E11 | 73.7 | 0.32 |
| 01-Nov-23 | M1.1 | 2.05 | 11:56 | 2 | 0 | 4 | -14.67° | -7 | - | 72 | 0.37 |
| 02-Nov-23 | C4.9 | 0.57 | 10:52 | 3 | 9 | 20 | 19.96° | -2 | - | 73.9 | 0.34 |
| 02-Nov-23 | C6.4 | 1.08 | 11:57 | 4 | 3 | 6 | -7.73° | -5 | - | 74.2 | 0.32 |
| 08-Nov-23 | C4.7 | 0.6 | 08:42 | 5 | 3 | 20 | -5.43° | -32 | N10W07 | 73.2 | 0.34 |
| 08-Nov-23 | C6.8 | 0.95 | 14:21 | 6 | 3 | 17 | -30.8° | -26 | N10W07 | 73.7 | 0.32 |
| 11-Nov-23 | C7.1 | 1.14 | 09:30 | 5 | 2 | 12 | -43.76° | -12 | N09W52 | 72.2 | 0.31 |
| 11-Nov-23 | C3.8 | 0.77 | 14:06 | 2 | 3 | 4 | -25° | -16 | S14W68 | 74 | 0.33 |
| 12-Nov-23 | C8.4 | 1.5 | 10:15 | 5 | 4 | 17 | 50.04° | -2 | S15W60 | 74.2 | 0.37 |
| 14-Nov-23 | C2.7 | 0.18 | 07:37 | 7 | 1 | 6 | 39.67° | 4 | S15W87 | 73.6 | 0.35 |
| 15-Nov-23 | C8.3 | 1.05 | 09:34 | 3 | 4 | 22 | -44.18° | -12 | S18W93 | 74.2 | 0.31 |
| 15-Nov-23 | C2.8 | 0.23 | 10:06 | 8 | 4 | 23 | -14.57° | -11 | - | 73.1 | 0.33 |
| 16-Nov-23 | C2.5 | 0.71 | 10:03 | 2 | 0 | 11 | -17.53° | 0 | - | 73.8 | 0.36 |
| 19-Nov-23 | C7.5 | 1.96 | 14:10 | 7 | 7 | 64 | -31.31° | 14 | S18E43 | 73 | 0.31 |
| 19-Nov-23 | C3.7 | 0.23 | 12:39 | 3 | 4 | 11 | -64.34° | 10 | N18E55 | 73.6 | 0.31 |
| 23-Nov-23 | C7.8 | 1.03 | 11:15 | 3 | 1 | 1 | 12.89° | -23 | N19E24 | 73.2 | 0.37 |
| 16-Dec-23 | C3.9 | 0.73 | 08:43 | 6 | 4 | 16 | 11.6° | -16 | N05W80 | 72.1 | 0.39 |
| 31-Dec-23 | C4.1 | 0.84 | 08:46 | 6 | 3 | 16 | -27.39° | 7 | - | 73.5 | 0.33 |
| 01-Dec-23 | M1.1 | 1.78 | 10:10 | 8 | 1 | 6 | -30.96° | -17 | N17W81 | 69 | 0.42 |
| 02-Dec-23 | C2.2 | 0.28 | 10:19 | 5 | 4 | 2 | -0.81° | -68 | N19W0* | 73.6 | 0.34 |
| 03-Dec-23 | C4 | 0.68 | 13:37 | 3 | 1 | 13 | 5.23° | -31 | S15E22 | 73.9 | 0.33 |
| 05-Dec-23 | C5.9 | 0.78 | 09:00 | 4 | 6 | 24 | 1.82° | -16 | - | 73.6 | 0.37 |
| 05-Dec-23 | M1.5 | 2.18 | 12:17 | 1 | 3 | 37 | -15.38° | -36 | N18E67 | 72 | 0.38 |
| 06-Dec-23 | C9.4 | 1.83 | 13:52 | 8 | 5 | 28 | -55.42° | -23 | N19E53 | 74 | 0.33 |
| 06-Dec-23 | M2.1 | 2.92 | 11:16 | 5 | 5 | 38 | -28.28° | -19 | N19E53 | 71 | 0.32 |
| 07-Dec-23 | C7.6 | 1.18 | 11:52 | 3 | 3 | 19 | -41.96° | -8 | N18E41 | 74.1 | 0.32 |
| 08-Dec-23 | C7.8 | 1.41 | 06:46 | 4 | 4 | 7 | 18.31° | -2 | N18E26 | 69.9 | 0.37 |
| 09-Dec-23 | C3.7 | 0.55 | 10:53 | 1 | 5 | 20 | -22.22° | -4 | S22W59 | 74.2 | 0.32 |
| 09-Dec-23 | C5.6 | 0.46 | 12:38 | 9 | 3 | 30 | -26.65° | -5 | S22W59 | 73.4 | 0.36 |
| 10-Dec-23 | C4.3 | 0.72 | 10:22 | 4 | 5 | 4 | -3.82° | -4 | S23W71 | 73 | 0.32 |
| 10-Dec-23 | C7 | 1.65 | 12:50 | 5 | 4 | 43 | -17.87° | -3 | S23W71 | 74.1 | 0.33 |
| 10-Dec-23 | M2.3 | 3.54 | 09:26 | 8 | 3 | 37 | -52.4° | -4 | S23W71 | 71 | 0.5 |
| 15-Dec-23 | C4.5 | 1.12 | 09:00 | 2 | 4 | 2 | -72.22° | -28 | N05W64 | 74.2 | 0.32 |
| 12-Dec-23 | C9.1 | 1.98 | 09:13 | 4 | 5 | 21 | -7.93° | -6 | N06W23 | 73.6 | 0.33 |
| 14-Dec-23 | M5.84 | 3.03 | 13:16 | 23 | 2 | 8 | -4.32° | -42 | N05W58 | 71 | 0.34 |
| 15-Dec-23 | C7.4 | 1.35 | 11:29 | 7 | 7 | 15 | -17.96° | -17 | N05W64 | 73.1 | 0.37 |
| 15-Dec-23 | M6.3 | 2.19 | 12:48 | 4 | 3 | 4 | -10.42° | -6 | N05W64 | 72 | 0.38 |
| 16-Dec-23 | C3.6 | 0.87 | 11:21 | 4 | 5 | 20 | -15.51° | -9 | N05W80 | 74.4 | 0.33 |
| 17-Dec-23 | C4.1 | 0.41 | 12:19 | 5 | 3 | 8 | -20.56° | -53 | N05W94 | 73.6 | 0.35 |
| 19-Dec-23 | C7.3 | 1.14 | 08:37 | 4 | 3 | 21 | -9.25° | -30 | N09W02 | 73.2 | 0.33 |
| 19-Dec-23 | C3.7 | 0.34 | 12:11 | 2 | 3 | 13 | -40.83° | -24 | N09W02 | 74.1 | 0.32 |
| 20-Dec-23 | C7.9 | 0.5 | 11:34 | 2 | 1 | 23 | -29.42° | -20 | N11E06 | 74.1 | 0.36 |
| 20-Dec-23 | C8.2 | 1.17 | 14:28 | 6 | 4 | 22 | -45.4° | -23 | N11E06 | 73 | 0.31 |
| 21-Dec-23 | M4.2 | 4.25 | 11:08 | 6 | 0 | 36 | -31.85° | -17 | S52W72 | 70 | 0.47 |
| 26-Dec-23 | C4.4 | 0.3 | 10:34 | 4 | 3 | 18 | -5.67° | 9 | S20W51 | 74.1 | 0.33 |
| 29-Dec-23 | C9.7 | 1.73 | 13:30 | 6 | 6 | 27 | -4.38° | 10 | N14W52 | 74 | 0.32 |
| 31-Dec-23 | C3.3 | 0.24 | 10:00 | 5 | 4 | 13 | -46.79° | 6 | - | 74.1 | 0.32 |
| 31-Dec-23 | C9.5 | 1.07 | 13:51 | 2 | 4 | 33 | 17.52° | 4 | N05E75 | 73.9 | 0.32 |
| 31-Dec-23 | C8.2 | 2.01 | 14:45 | 7 | 3 | 19 | -12.78° | 2 | N05E75 | 73.6 | 0.34 |
| 01-Jan-24 | M2.3 | 4.1 | 14:25 | 0 | 2 | 41 | 6.97° | 6 | N06E63 | 70 | 0.43 |
| 01-Jan-24 | C4.7 | 1.05 | 13:39 | 7 | 4 | 13 | 21.75° | 0 | N06E63 | 71.4 | 0.35 |
| 04-Jan-24 | M3.8 | 4.99 | 07:28 | 3 | 4 | 18 | -78.94° | -4 | N07E25 | 68 | 0.37 |
| 07-Jan-24 | C3.1 | 0.35 | 14:06 | 3 | 4 | 8 | -50.04° | -4 | N05W20 | 73.8 | 0.34 |
| 07-Jan-24 | C3.1 | 0.23 | 12:10 | 3 | 5 | 21 | -27.09° | 6 | N05W20 | 73.4 | 0.35 |
| 07-Jan-24 | C5.6 | 0.33 | 13:19 | 8 | 2 | 4 | 2.67° | 1 | N05W20 | 73.2 | 0.33 |
| 10-Jan-24 | C9.5 | 0.51 | 08:57 | 6 | 3 | 19 | -64.67° | 11 | N20W81 | 73.2 | 0.31 |
| 10-Jan-24 | C6.5 | 0.69 | 12:30 | 7 | 5 | 29 | -33.97° | 3 | - | 74.2 | 0.35 |
| 10-Jan-24 | C6.9 | 0.85 | 11:19 | 5 | 5 | 18 | -44.09° | 2 | N20W81 | 74.1 | 0.32 |
| 23-Jan-24 | C6.2 | 0.7 | 15:06 | 16 | 7 | 14 | -24.13° | 3 | N27W05 | 70.2 | 0.37 |
| 24-Jan-24 | C3.9 | 0.5 | 10:06 | 7 | 0 | 7 | 7.77° | -9 | S17W56 | 73.6 | 0.36 |
| 17-Mar-24 | C6.6 | 1.21 | 09:34 | 2 | 6 | 13 | -48.69° | 10 | - | 74.5 | 0.32 |
| 17-Mar-24 | C3.8 | 0.46 | 11:18 | 6 | 1 | 2 | -37.76° | 9 | N16E70 | 73.9 | 0.33 |
| 18-Mar-24 | M1 | 0.39 | 09:45 | 5 | 0 | 0 | -40.23° | 3 | N16E56 | 74 | 0.37 |
| 19-Mar-24 | M1.4 | 3.05 | 08:04 | 4 | 6 | 32 | -55.99° | -12 | S12E48 | 71 | 0.34 |
| 19-Mar-24 | C5.3 | 0.67 | 10:48 | 6 | 3 | 3 | -52.66° | -7 | S12E48 | 72.8 | 0.35 |
| 19-Mar-24 | C4.2 | 0.25 | 11:49 | 2 | 2 | 8 | -39.59° | 16 | S12E48 | 73.1 | 0.32 |
| 20-Mar-24 | C6.3 | 0.8 | 15:30 | 2 | 7 | 26 | -15.64° | 4 | S12E39 | 74 | 0.36 |
| 20-Mar-24 | C4 | 0.57 | 07:58 | 2 | 4 | 17 | -22.6° | -4 | S12E39 | 73.9 | 0.33 |
| 20-Mar-24 | M7.4 | 4.17 | 13:07 | 4 | 2 | 51 | 2.82° | 2 | S12E39 | 70 | 0.44 |
| 22-Mar-24 | C5.7 | 0.86 | 10:47 | 2 | 1 | 8 | -35.43° | -16 | S13E11 | 73.5 | 0.31 |
| 23-Mar-24 | M2.4 | 2.03 | 12:42 | 2 | 3 | 5 | -1.94° | -15 | S13W02 | 72 | 0.36 |
| 24-Mar-24 | M2.2 | 2.03 | 11:39 | 6 | 4 | 28 | -15.32° | -55 | S13W14 | 70 | 0.37 |
| 24-Mar-24 | M1.3 | 1.49 | 13:21 | 4 | 1 | 9 | 15.22° | -27 | S13W14 | 69 | 0.48 |
| 24-Mar-24 | M1.4 | 0.73 | 06:57 | 8 | 3 | 15 | -58.15° | -56 | S13W14 | 73 | 0.31 |
| 24-Mar-24 | C7.4 | 0.61 | 15:00 | 5 | 5 | 15 | -33.6° | -25 | S13W14 | 73.7 | 0.31 |
| 13-Apr-24 | M2.41 | 2.77 | 10:30 | 0 | -1 | 19 | -23.82° | 9 | S10E67 | 71 | 0.31 |
| 14-Apr-24 | M4.3 | 4.62 | 08:04 | 7 | 3 | 34 | -46.2° | 18 | S10E53 | 70 | 0.53 |
| 15-Apr-24 | M2.3 | 2.8 | 14:15 | 2 | 4 | 41 | 23.77° | 12 | N25W42 | 69 | 0.33 |
| 15-Apr-24 | M1.2 | 1.55 | 15:04 | 7 | 3 | 9 | 34.28° | 10 | N30E48 | 73 | 0.39 |
| 17-Apr-24 | C8 | 0.65 | 08:58 | 12 | 0 | -12 | -22.56° | 6 | N29E22 | 71.7 | 0.36 |
| 18-Apr-24 | C7.2 | 0.66 | 11:40 | 0 | 2 | 3 | -60.63° | -4 | S08E08 | 74.2 | 0.34 |
| 18-Apr-24 | M2.2 | 2.39 | 08:21 | 8 | 4 | 22 | -42.94° | -1 | S18E05 | 72 | 0.36 |
| 18-Apr-24 | M1.3 | 1.54 | 13:10 | 4 | 4 | 3 | 10.47° | -1 | S12E18 | 73 | 0.39 |
| 19-Apr-24 | M2.1 | 3.07 | 10:25 | 5 | 3 | 22 | -23.12° | -42 | S10W02 | 71 | 0.34 |
| 31-Dec-24 | M1.09 | 1.23 | 11:44 | 9 | 4 | 20 | -25.03° | -8 | - | 71 | 0.31 |
| 01-Jan-25 | M1.1 | 1.87 | 10:18 | 1 | 3 | 38 | -43.62° | -78 | N13W83 | 73 | 0.32 |
| 18-Jan-25 | M1.1 | 0.82 | 08:42 | 5 | 5 | 13 | -58.34° | -29 | - | 70 | 0.35 |
| 18-Jan-25 | C8.8 | 0.83 | 08:01 | 3 | 1 | 4 | -1.3° | -29 | S08E20 | 73.1 | 0.34 |
| 20-Jan-25 | C5 | 0.62 | 11:07 | 2 | 0 | 0 | 0.25° | -27 | S19W85 | 74.6 | 0.33 |
| 22-Jan-25 | C6.9 | 1.34 | 11:51 | 4 | -1 | 31 | -49.33° |  | S10W35 | 73.2 | 0.34 |
| 23-Jan-25 | C9.1 | 2.65 | 07:39 | 4 | 7 | 23 | -32.96° | -19 | S09W49 | 71.1 | 0.42 |
| 24-Jan-25 | C4.4 | 0.3 | 09:42 | 6 | 3 | 17 | -44.93° | -15 | N12W50 | 73.3 | 0.31 |
| 25-Jan-25 | C4.6 | 0.48 | 08:55 | 0 | 3 | 17 | 2.36° | -1 | S10W76 | 72.3 | 0.36 |
| 26-Jan-25 | C2.3 | 0.39 | 12:30 | 4 | -1 | 3 | -10.75° |  | - | 74 | 0.34 |
| 27-Jan-25 | M2.6 | 3.91 | 13:42 | 7 | 1 | 38 | -0.34° | 14 | N13E82 | 69 | 0.4 |
| 27-Jan-25 | C4.4 | 0.57 | 10:49 | 6 | 4 | 12 | -16.13° | 8 | N13E82 | 72.5 | 0.33 |
| 29-Jan-25 | M1 | 1.85 | 09:39 | 3 | 1 | 24 | -47.43° | -16 | N19E53 | 70 | 0.33 |
